# Supplementary material
Source: publisher figshare collection journal article supplement (https://tandf.figshare.com/ndownloader/files/14244407)
Supplement: Supplementary file 1 [file 14244407]

Table: Spearmans rho for general mental ability and performance measures

|  | 1 | 2 | 3 | 4 | 5 | 6 | 7 | 8 |
| --- | --- | --- | --- | --- | --- | --- | --- | --- |
| (1) GMA | - |  |  |  |  |  |  |  |
| (2) Production outcome – training 1 | .335* | - |  |  |  |  |  |  |
| (3) Production outcome – training 2 | .528** | .738** | - |  |  |  |  |  |
| (4) Production outcome – test 1 | .353* | .695** | .729** | - |  |  |  |  |
| (5) Production outcome – test 2 | .167 | .105 | .183 | .186 | - |  |  |  |
| (6) Monitoring – training 1 | .496** | .161 | .204 | .184 | .090 | - |  |  |
| (7) Monitoring – training 2 | .569** | .095 | .242 | .239 | .127 | .844** | - |  |
| (8) Monitoring – test 1 | .529** | .222 | .308 | .358* | .389* | .622** | .760** | - |
| (9) Monitoring – test 2 | .239 | .139 | .225 | .368* | .565** | .328* | .404* | .680** |

Note: GMA=General mental ability, **=*p*<.01, *=*p*<.05
